# Supplementary material
Source: PubMed Central journal article supplement (PMC3987942)
Supplement: NIHMS568554-supplement-04.pdf [file NIHMS568554-supplement-04.pdf]

**Table S1. Cytokine and chemokine production from LC exposed to high risk, low risk and cutaneous HPV genotypes<sup>a</sup>.**

|                                 | Untreated<br>Min – Max<br>(mean) | LPS                      | HPV16                   | HPV18              | HPV31              | HPV45              | HPV11                   | HPV5                  | HPV1                    |
|---------------------------------|----------------------------------|--------------------------|-------------------------|--------------------|--------------------|--------------------|-------------------------|-----------------------|-------------------------|
| <b>IL-1<math>\beta</math></b>   | 0 – 3.2<br>(1.4)                 | 5.8 – 21.8<br>(14.4)     | 0 – 6.7<br>(2.8)        | 0 – 4.9<br>(1.3)   | 0 – 3.8<br>(1.1)   | 0 – 3.6<br>(1.3)   | 0 – 6.4<br>(1.8)        | 0 – 5.4<br>(1.6)      | 0 – 5.8<br>(2.4)        |
| <b>IL-6</b>                     | 0 – 29 (9.6)                     | 102 –<br>1308<br>(542)   | 0 – 60<br>(21)          | 1.5 – 46<br>(16)   | 0 – 20<br>(6.4)    | 0 – 19<br>(7.4)    | 0 – 50<br>(17)          | 0 – 22<br>(7.8)       | 6 – 59<br>(27)          |
| <b>TNF<math>\alpha</math></b>   | 7.1 – 45<br>(26)                 | 159 – 798<br>(444)       | 13 – 58<br>(32)         | 8.6 – 48<br>(27)   | 6.4 – 40<br>(19)   | 7.0 – 39<br>(24)   | 15 – 54<br>(31)         | 7.8 – 32<br>(21)      | 13 – 60<br>(40)         |
| <b>IL-10</b>                    | 1.5 – 45<br>(16)                 | 11 – 251<br>(138)        | 2.2 – 44<br>(19)        | 1.4 – 39<br>(15)   | 0 – 39<br>(13)     | 2.0 – 42<br>(15)   | 3.2 – 42<br>(17)        | 2.3 – 45<br>(18)      | 3.6 – 48<br>(19)        |
| <b>IL-12p70</b>                 | 0 – 7.5<br>(2.0)                 | 0 – 7.6<br>(3.9)         | 0 – 3.9<br>(1.3)        | 0 – 2.8<br>(0.8)   | 0 – 7.9<br>(1.9)   | 0 – 4.2<br>(1.3)   | 0 – 4.4<br>(1.8)        | 0 – 5.3<br>(1.7)      | 0 – 3.1<br>(1.0)        |
| <b>IFN<math>\alpha</math></b>   | 0 – 26 (12)                      | 0 – 27<br>(8.3)          | 0 – 27<br>(13)          | 0 – 20<br>(7.2)    | 0 – 26<br>(9.6)    | 0 – 20<br>(7.0)    | 0 – 32<br>(14)          | 0 – 19<br>(10)        | 0 – 25<br>(10)          |
| <b>IL-8</b>                     | 290 – 570<br>(438)               | 408 –<br>11800<br>(6730) | 371 – 683<br>(527)      | 398 – 575<br>(469) | 275 – 525<br>(377) | 275 – 530<br>(408) | 383 – 700<br>(521)      | 276 –<br>525<br>(406) | 408 –<br>817<br>(568)   |
| <b>IP-10</b>                    | 12 – 520<br>(150)                | 44 – 2195<br>(706)       | 219 –<br>3164<br>(1129) | 96 – 2479<br>(839) | 5.8 – 341<br>(131) | 4 – 378<br>(134)   | 165 –<br>3021<br>(1054) | 17 – 242<br>(107)     | 335 –<br>5172<br>(1963) |
| <b>MCP-1</b>                    | 63 – 1428<br>(477)               | 175 –<br>5005<br>(1278)  | 78 – 4746<br>(1151)     | 83 – 3501<br>(840) | 24 – 2372<br>(627) | 53 – 1961<br>(575) | 69 – 4733<br>(992)      | 85 –<br>1755<br>(522) | 106 –<br>5420<br>(1332) |
| <b>MIP-1<math>\alpha</math></b> | 0 – 142<br>(45)                  | 305 –<br>4209<br>(1103)  | 0 – 74<br>(38)          | 0 – 63<br>(29)     | 0 – 130<br>(64)    | 0 – 126<br>(63)    | 0 – 182<br>(44)         | 0 – 67<br>(27)        | 42 – 139<br>(89)        |
| <b>MIP-1<math>\beta</math></b>  | 51 – 255<br>(172)                | 213 –<br>2555<br>(1433)  | 40 – 437<br>(267)       | 61 – 385<br>(225)  | 0 – 383<br>(198)   | 37 – 444<br>(208)  | 47 – 458<br>(230)       | 46 – 267<br>(161)     | 122 –<br>658<br>(390)   |
| <b>RANTES</b>                   | 15 – 192<br>(54)                 | 85 – 2063<br>(865)       | 28 – 112<br>(67)        | 20 – 123<br>(48)   | 9 – 149<br>(48)    | 14 – 93<br>(40)    | 16 – 270<br>(75)        | 15 – 65<br>(34)       | 59 – 173<br>(126)       |

<sup>a</sup>Concentration reported in pg/mL. Data compiled from LC of 4 individual donors
